# Supplementary material for: 2-D transition metal trichalcophosphogenide FePS3 against multi-drug resistant microbial infections
Source: Royal Society of Chemistry journal article supplement (doi:10.1039/d4nr03409k), 2024-01-01
Supplement: d4nr03409k1.pdf [file d4nr03409k1.pdf]

## Supporting Information

# 2-D Transition Metal Trichalophosphogenide FePS<sub>3</sub> Against Multi-Drug Resistant Microbial Infections

SHREEHARI KODAKKAT<sup>1</sup>, PIERRE H.A. VALLIANT,<sup>1</sup> SERENA CH'NG,<sup>1</sup> Z.L. SHAW,<sup>2</sup>  
MIYAH NAIM AWAD,<sup>1</sup> BILLY J. MURDOCH,<sup>1</sup> ANDREW J. CHRISTOFFERSON,<sup>1</sup>  
SAFFRON J. BRYANT,<sup>1,\*</sup> SUMEET WALIA,<sup>1,\*</sup> and AARON ELBOURNE<sup>1,\*</sup>

\*Corresponding Authors

<sup>1</sup>School of Science, RMIT University, Melbourne VIC 3001, Australia.

<sup>2</sup>School of Engineering, RMIT University, Melbourne VIC 3001, Australia.

**Key words:** antibacterial, antimicrobial, bacteria, fungi, iron phosphorus trisulfide

## Supplementary Material

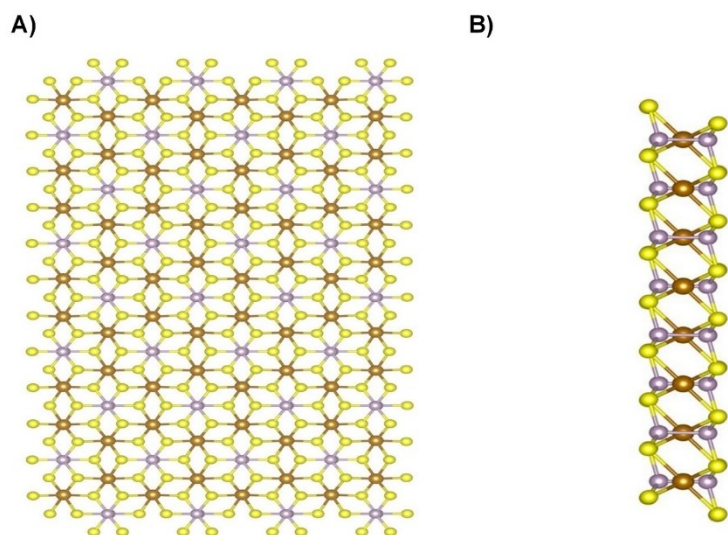

**Figure S1.** 3-D Structure of mechanically- exfoliated FePS<sub>3</sub> nanosheet (Monolayer)

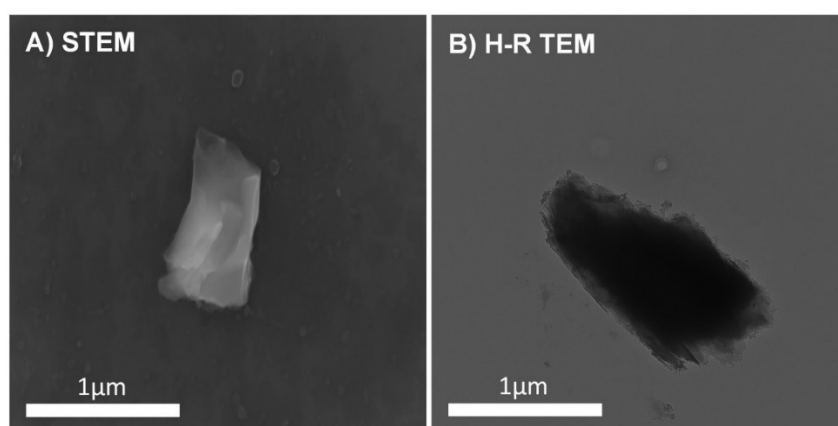

**Figure S2.** Additional Characterization of flakes A) STEM image, B) H-R TEM image

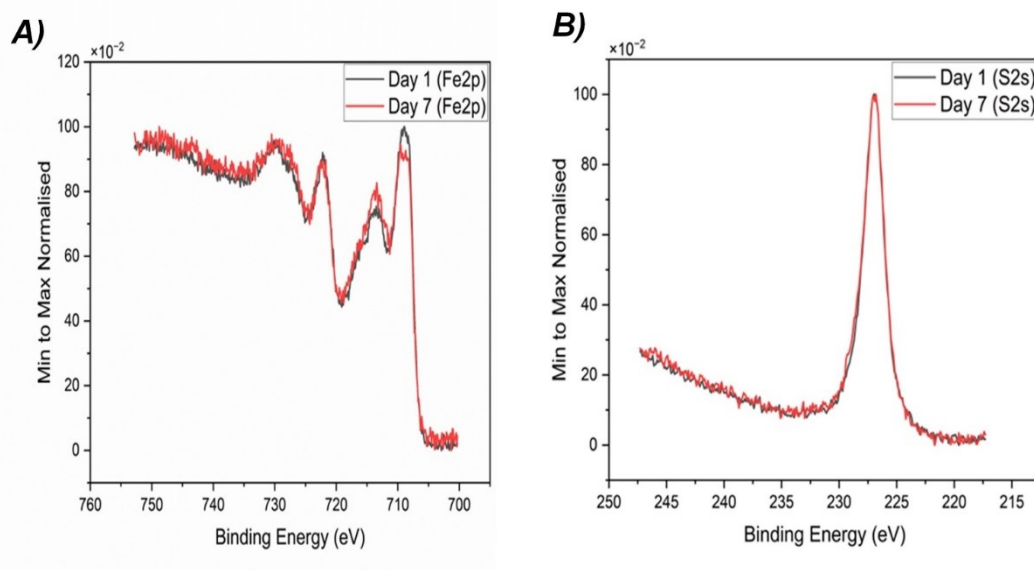

**Figure S3.** XPS analysis of the exfoliated flakes showing peaks in the (A) iron and (B) sulphur components.

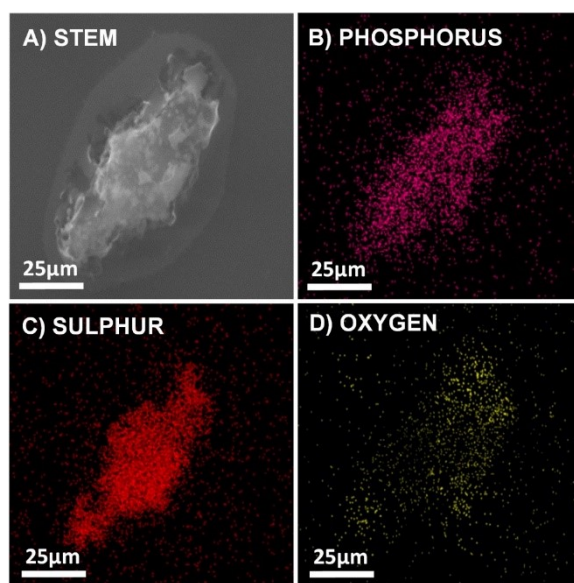

**Figure S4.** Degradation of FePS<sub>3</sub> nanoflakes. A) STEM image of a degrading FePS<sub>3</sub> nanoflake after 24 hours under ambient conditions. Corresponding EDS images showing B) phosphorus, C) sulphur, and D) oxygen components.

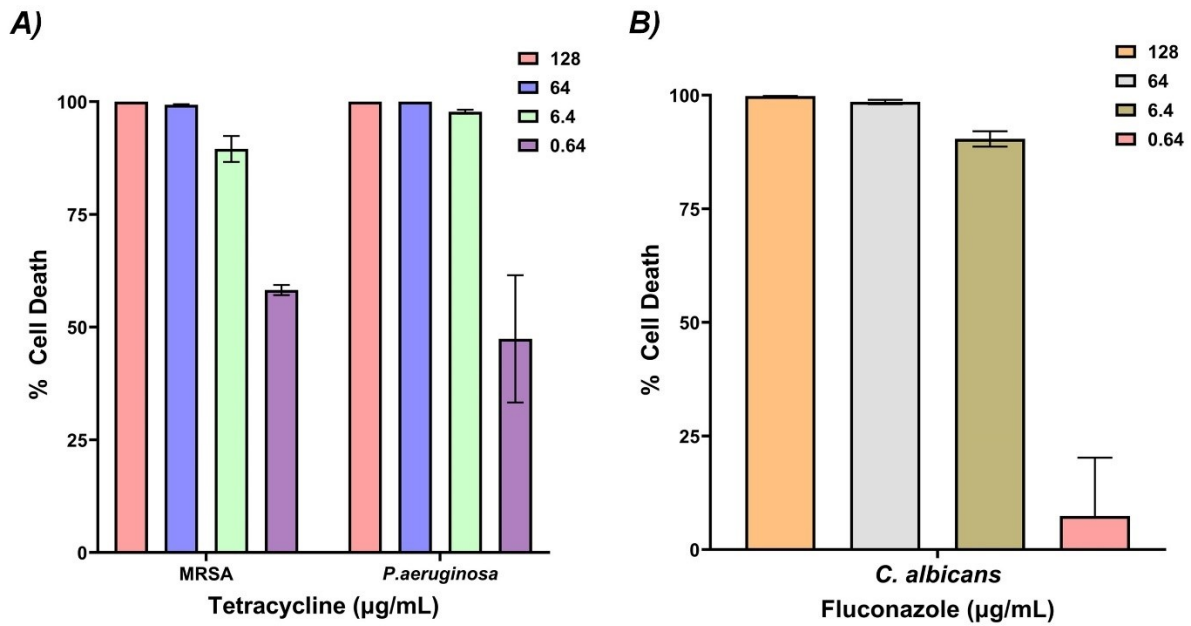

**Figure S5:** Antimicrobial efficacy of positive controls. (A) Tetracycline was used as a positive control for bacterial strains (MRSA and *P. aeruginosa*) and (B) Fluconazole for *Candida albicans*. The concentrations used for both positive controls are in a range of 0.64- 128 µg/mL. Values are mean ± SEM. n = 3.

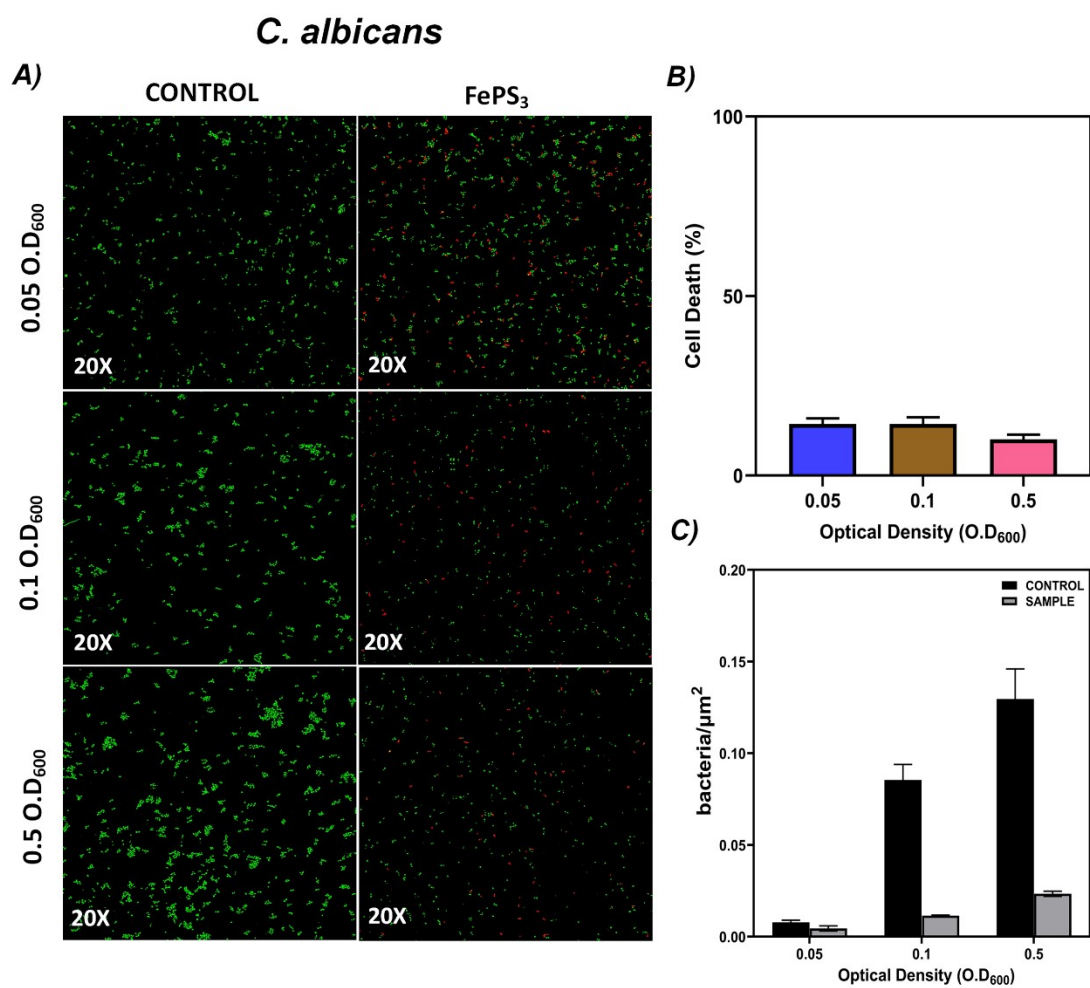

**Figure S6.** Antimicrobial properties of FePS<sub>3</sub> nanoflakes against a series of fungal population densities. (A) CLSM images of control and treated *C. albicans*. (B) Relative quantification of cell death in fungi.

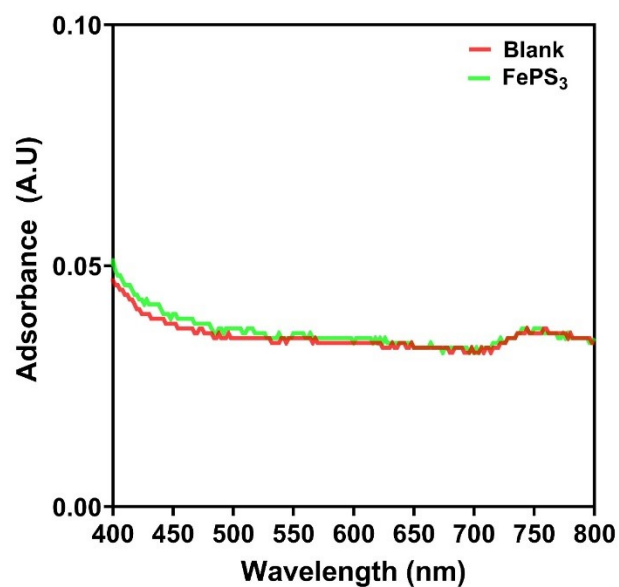

**Figure S7.** UV-Vis adsorbance spectra of blank (in red) and FePS<sub>3</sub> treated samples (in green).

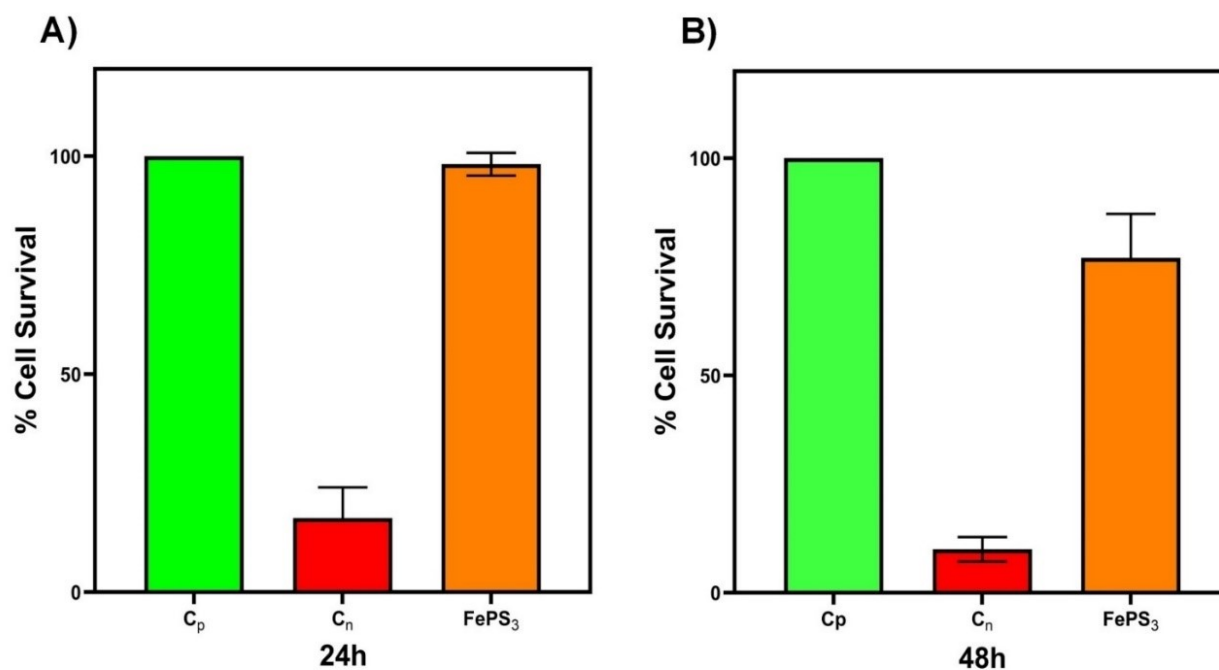

**Figure S8.** Hemolysis assay of FePS<sub>3</sub> nanoflakes against red blood cells. (A) 24 h and (B) 48 h. C<sub>p</sub> corresponds to the positive control (C<sub>p</sub>), and C<sub>n</sub> negative control (treated with 100% ethanol).

**Table S1. Table is recreated from Shaw *et al.*, 2021<sup>1</sup>.** Comparative antimicrobial activity of commonly investigated nanomaterials. Abbreviations: BP: black phosphorus, NMP: N-methyl-2-pyrrolidone, DMPI: N,N'-dimethylpropyleneurea, PPMS: 4-pyridonemethylstyrene, NPs: nano-particles, NB: Not bactericidal, N/A: Not applicable, NR: Not reported. Material 1 highlighted in blue is that of this study.

| Materials                                     | Sizes/<br>Thickness                          | Concentration            | Activated                       | Microbes Tested                                                                                    |                                                                                                                                | Mammalian Testing | Treatment Parameters                                       |                           |                                                                      |                             |
|-----------------------------------------------|----------------------------------------------|--------------------------|---------------------------------|----------------------------------------------------------------------------------------------------|--------------------------------------------------------------------------------------------------------------------------------|-------------------|------------------------------------------------------------|---------------------------|----------------------------------------------------------------------|-----------------------------|
|                                               |                                              |                          |                                 | Bacteria                                                                                           | Fungi                                                                                                                          | Cytotoxicity      | Bactericidal Activity                                      | Bacterial Treatment Times | Fungicidal Activity                                                  | Bactericidal Treatment time |
| Mechanically Exfoliated FePS <sub>3</sub>     | Size: 2-4µm<br>Thickness: 65nm               | 816.7 ng/cm <sup>2</sup> | No                              | MRSA, <i>P.aeruginosa</i>                                                                          | <i>C.albicans</i>                                                                                                              | No                | 99.99% (MRSA) and 99.9% ( <i>P.aeruginosa</i> )            | 4 hours                   | 50% ( <i>C.albicans</i> )                                            | 4 hours                     |
| Mechanically Exfoliated BP                    | Size: 500 nm - 5 µm<br>Thickness: 15 – 90 nm | ~900 ng/cm <sup>2</sup>  | No                              | <i>E. coli</i> , <i>P. aeruginosa</i> , <i>MRSA</i> , <i>S. typhimurium</i> , and <i>B. cereus</i> | <i>C. albicans</i> , <i>C. auris</i> and sensitive, fluconazole-resistant, and Amphotericin B-resistant <i>C. neoformans</i> . | No                | 96.3% ( <i>E.coli</i> ) and 96.2% ( <i>P. aeruginosa</i> ) | 2 hours                   | 99.92% ( <i>C. albicans</i> ) and 99.3% ( <i>C. neoformans</i> {FR}) | 2 hours                     |
| NMP - BP with Ti-SA <sub>4</sub> <sup>2</sup> | Size: 220 nm<br>Thickness: 5 nm              | 50 µg/mL                 | No                              | <i>E. coli</i> & <i>S. aureus</i>                                                                  | No                                                                                                                             | NR                | 99.2% ( <i>E. coli</i> ), 94.6 % ( <i>S. aureus</i> ).     | 3 hr                      | NR                                                                   | NR                          |
| DMPU - BP <sup>3</sup>                        | Size: 0.1 - 4 µm.<br>Thickness: 2 - 15.4 nm  | 160 µg/mL                | Yes, NIR irradiation at 808 nm. | <i>E. coli</i> & <i>S. aureus</i>                                                                  | No                                                                                                                             | NR                | 99.2%                                                      | 3 - 10 min                | NR                                                                   | NR                          |

|                                             |                                               |                |                                 |                                     |                                      |                                                    |                                                                       |           |                                    |    |
|---------------------------------------------|-----------------------------------------------|----------------|---------------------------------|-------------------------------------|--------------------------------------|----------------------------------------------------|-----------------------------------------------------------------------|-----------|------------------------------------|----|
| Ag and BP nanosheets <sup>4</sup>           | AgNPs: 30 nm<br>BP: 220 nm<br>Thickness: 4 nm | 25 - 40 µg/mL  | Yes; NIR irradiation at 808 nm. | MRSA                                | No                                   | No                                                 | 93%.                                                                  | 5 min     | NR                                 | NR |
| DCM - BP with PPMS <sup>5</sup>             | Size: microns<br>Thickness: 4.2 - 4.5 nm      | 100 µg/ml      | Yes; irradiation at 660 nm      | <i>E. coli</i> & <i>S. aureus</i>   | No                                   | No                                                 | 99.3% & 99.2% ( <i>E. coli</i> ), 76.5% & 69.5% ( <i>S. aureus</i> ). | 10 min    | NR                                 | NR |
| Millipore water - BP                        | Size: 215.8 nm<br>Thickness: 1.6 nm           | 50- 100 µg/mL. | No                              | <i>E. coli</i> & <i>B. subtilis</i> | No                                   | NR                                                 | 91.65% & 99.69%                                                       | 6 - 12 hr | NR                                 | NR |
| Au-BP Nanosheets <sup>6</sup>               | Size: >100 nm<br>Thickness: 2 nm              | <10 µg/mL      | No                              | <i>E. coli</i>                      | No                                   | NR                                                 | 94.7%                                                                 | 8 hr      | NR                                 | NR |
| BP-TiO <sub>2</sub> <sup>7</sup>            | NR                                            | 25 µg/mL       | Yes; UV-vis                     | <i>E. coli</i> & <i>S. aureus</i>   | No                                   | NR                                                 | NR                                                                    | 70 min    | NR                                 | NR |
| MoS <sub>2</sub> Composites <sup>8, 9</sup> | Size: NR<br>Thickness: 2.2 nm                 | ≤1 mg/mL       | Yes, NIR <sup>8</sup>           | <i>E. coli</i> & <i>S. aureus</i>   | No                                   | Concentration & system dependent <sup>10, 11</sup> | 100%                                                                  | ≤6 hr     | NR                                 | NR |
| Ag NPs <sup>12</sup>                        | Size: 4 - 24 nm                               | 50 µg/mL       | No                              | <i>E. coli</i>                      | Yes <sup>13-16</sup>                 | Yes; shape & concentration dependent <sup>17</sup> | 100%                                                                  | 24 hr     | Varying degrees. <sup>15, 18</sup> | NR |
| Au NPs <sup>19</sup>                        | Size: 10 - 200 nm                             | Widely Variant | No                              | Controversial <sup>19</sup>         | Yes; <sup>20, 21</sup> controversial | Dose & size dependent <sup>24</sup>                | NB                                                                    | N/A       | MIC: 4 - 48 µg/mL                  | NR |
| ZnO NPs <sup>25, 26</sup>                   | Size: 50 - 250 nm                             | 0.25 g/L       | Yes, UV-vis <sup>25, 26</sup>   | <i>E. coli</i> & <i>S. aureus</i>   | Numerous Species <sup>27-29</sup>    | Yes <sup>30-32</sup>                               | Conditional, but >99%                                                 | 2 hr      | Yes <sup>28, 29, 33</sup>          | NR |



|                                               |                                                        |                                      |                         |                                 |                                                              |                                                                         |                           |        |                                                                  |    |
|-----------------------------------------------|--------------------------------------------------------|--------------------------------------|-------------------------|---------------------------------|--------------------------------------------------------------|-------------------------------------------------------------------------|---------------------------|--------|------------------------------------------------------------------|----|
| Graphene oxide (pure & reduced) <sup>34</sup> | Size: ~0.31 $\mu\text{m}$<br>Size: ~2.75 $\mu\text{m}$ | 80 $\mu\text{g/mL}$                  | No                      | <i>E. coli</i>                  | Yes, <sup>35</sup><br>enhanced<br>with NIR <sup>36</sup>     | Morphology,<br>chemistry, sys<br>dependent <sup>37, 38</sup>            | Pure: 90%<br>Reduced: 80% | 2 hr   | IC <sub>50</sub> : 50 –<br>100<br>$\mu\text{g/mL}$ <sup>35</sup> | NR |
| Graphene oxide <sup>39</sup>                  | Size: 5 - 20<br>$\mu\text{m}$<br>Thickness:<br>1.2 nm  | 200 $\mu\text{g/mL}$                 | No                      | None for pure<br>graphene oxide | NR                                                           | NR                                                                      | 0%                        | N/A    | NR                                                               | NR |
| TiO <sub>2</sub> NPs <sup>40</sup>            | Size: 79 nm                                            | 1200 $\mu\text{M}$                   | UV-<br>visible<br>Light | <i>E. coli</i>                  | Yes <sup>41</sup> ,<br>surface<br>additive <sup>42, 43</sup> | Yes,<br>concentration-<br>& time-<br>dependent<br>manner. <sup>44</sup> | 75% reduction             | N/A    | Yes <sup>41, 45</sup>                                            | NR |
| Cu-TiO <sub>2</sub><br>NPs <sup>46</sup>      | Size: 15-50<br>nm                                      | 1 mg/mL                              | UV-vis                  | <i>E. coli</i>                  | NR                                                           | NR                                                                      | 100% reduction            | N/A    | NR                                                               | NR |
| Au<br>nanostar <sup>47</sup>                  | Size: 50 –<br>100 nm                                   | Monolayer of<br>nanostar on<br>glass | NIR laser               | <i>S. aureus</i>                | NR                                                           | NR                                                                      | 99%                       | 30 min | NR                                                               | NR |
| Au<br>nanocross <sup>48</sup>                 | Size: ~100<br>nm                                       | 0.2 mg/mL                            | NIR laser               | <i>P. aeruginosa</i>            | NR                                                           | NR                                                                      | 99%                       | 5 min  | NR                                                               | NR |

## References

1. Z. L. Shaw, S. Kuriakose, S. Cheeseman, E. L. H. Mayes, A. Murali, Z. Y. Oo, T. Ahmed, N. Tran, K. Boyce, J. Chapman, C. F. McConville, R. J. Crawford, P. D. Taylor, A. J. Christofferson, V. K. Truong, M. J. S. Spencer, A. Elbourne and S. Walia, *ACS Applied Materials & Interfaces*, 2021, **13**, 17340-17352.
2. Z. Li, L. Wu, H. Wang, W. Zhou, H. Liu, H. Cui, P. Li, P. K. Chu and X.-F. Yu, *ACS Applied Nano Materials*, 2019, **2**, 1202-1209.
3. Z. Sun, Y. Zhang, H. Yu, C. Yan, Y. Liu, S. Hong, H. Tao, A. W. Robertson, Z. Wang and A. A. H. Pádua, *Nanoscale*, 2018, **10**, 12543-12553.
4. J. Ouyang, R.-Y. Liu, W. Chen, Z. Liu, Q. Xu, K. Zeng, L. Deng, L. Shen and Y.-N. Liu, *Journal of Materials Chemistry B*, 2018, **6**, 6302-6310.
5. L. Tan, J. Li, X. Liu, Z. Cui, X. Yang, K. W. K. Yeung, H. Pan, Y. Zheng, X. Wang and S. Wu, *Small*, 2018, **14**, 1703197.
6. Q. Wu, M. Liang, S. Zhang, X. Liu and F. Wang, *Nanoscale*, 2018, **10**, 10428-10435.
7. H. Uk Lee, S. C. Lee, J. Won, B.-C. Son, S. Choi, Y. Kim, S. Y. Park, H.-S. Kim, Y.-C. Lee and J. Lee, *Scientific Reports*, 2015, **5**, 8691.
8. W. Zhang, S. Shi, Y. Wang, S. Yu, W. Zhu, X. Zhang, D. Zhang, B. Yang, X. Wang and J. Wang, *Nanoscale*, 2016, **8**, 11642-11648.
9. T. I. Kim, B. Kwon, J. Yoon, I.-J. Park, G. S. Bang, Y. Park, Y.-S. Seo and S.-Y. Choi, *ACS Applied Materials & Interfaces*, 2017, **9**, 7908-7917.
10. W. Z. Teo, E. L. K. Chng, Z. Sofer and M. Pumera, *Chemistry – A European Journal*, 2014, **20**, 9627-9632.
11. X. Wang, N. D. Mansukhani, L. M. Guiney, Z. Ji, C. H. Chang, M. Wang, Y.-P. Liao, T.-B. Song, B. Sun, R. Li, T. Xia, M. C. Hersam and A. E. Nel, *Small*, 2015, **11**, 5079-5087.
12. I. Sondi and B. Salopek-Sondi, *Journal of colloid and interface science*, 2004, **275**, 177-182.
13. S. W. Kim, J. H. Jung, K. Lamsal, Y. S. Kim, J. S. Min and Y. S. Lee, *Mycobiology*, 2012, **40**, 53-58.
14. E. J. J. Mallmann, F. A. Cunha, B. N. M. F. Castro, A. M. Maciel, E. A. Menezes and P. B. A. Fachine, *Rev Inst Med Trop Sao Paulo*, 2015, **57**, 165-167.
15. A. Panáček, M. Kolář, R. Večeřová, R. Prucek, J. Soukupova, V. Kryštof, P. Hamal, R. Zbořil and L. Kvítek, *Biomaterials*, 2009, **30**, 6333-6340.
16. J. J. Artunduaga Bonilla, D. J. Paredes Guerrero, C. I. Sánchez Suárez, C. C. Ortiz López and R. G. Torres Sáez, *World Journal of Microbiology and Biotechnology*, 2015, **31**, 1801-1809.
17. T. Zhang, L. Wang, Q. Chen and C. Chen, *Yonsei Med J*, 2014, **55**, 283-291.
18. Z.-K. Xia, Q.-H. Ma, S.-Y. Li, D.-Q. Zhang, L. Cong, Y.-L. Tian and R.-Y. Yang, *Journal of Microbiology, Immunology and Infection*, 2016, **49**, 182-188.
19. Y. Zhang, T. P. Shareena Dasari, H. Deng and H. Yu, *Journal of Environmental Science and Health, Part C*, 2015, **33**, 286-327.
20. T. Ahmad, I. A. Wani, I. H. Lone, A. Ganguly, N. Manzoor, A. Ahmad, J. Ahmed and A. S. Al-Shihri, *Materials Research Bulletin*, 2013, **48**, 12-20.
21. C. E. Peña-González, E. Pedziwiatr-Werbicka, T. Martín-Pérez, E. M. Szewczyk, J. L. Copa-Patiño, J. Soliveri, J. Pérez-Serrano, R. Gómez, M. Bryszewska, J. Sánchez-Nieves and F. J. de la Mata, *International Journal of Pharmaceutics*, 2017, **528**, 55-61.
22. P. Falagan-Lotsch, E. M. Grzincic and C. J. Murphy, *Proceedings of the National Academy of Sciences*, 2016, **113**, 13318-13323.
23. J.-Y. Wang, J. Chen, J. Yang, H. Wang, X. Shen, Y.-M. Sun, M. Guo and X.-D. Zhang, *International journal of nanomedicine*, 2016, **11**, 3475.
24. Y. Pan, S. Neuss, A. Leifert, M. Fischler, F. Wen, U. Simon, G. Schmid, W. Brandau and W. Jahnen-Dechent, *Small*, 2007, **3**, 1941-1949.
25. L. Zhang, Y. Jiang, Y. Ding, M. Povey and D. York, *Journal of Nanoparticle Research*, 2007, **9**, 479-489.
26. E. Ozkan, E. Allan and I. P. Parkin, *ACS Omega*, 2018, **3**, 3190-3199.

27. P. A. Arciniegas-Grijalba, M. C. Patiño-Portela, L. P. Mosquera-Sánchez, J. A. Guerrero-Vargas and J. E. Rodríguez-Páez, *Applied Nanoscience*, 2017, **7**, 225-241.
28. M. A. Gondal, A. J. Alzahrani, M. A. Randhawa and M. N. Siddiqui, *Journal of Environmental Science and Health, Part A*, 2012, **47**, 1413-1418.
29. A. Lipovsky, Y. Nitzan, A. Gedanken and R. Lubart, *Nanotechnology*, 2011, **22**, 105101.
30. V. Sharma, R. K. Shukla, N. Saxena, D. Parmar, M. Das and A. Dhawan, *Toxicology letters*, 2009, **185**, 211-218.
31. W. Song, J. Zhang, J. Guo, J. Zhang, F. Ding, L. Li and Z. Sun, *Toxicology letters*, 2010, **199**, 389-397.
32. V. Sharma, D. Anderson and A. Dhawan, *Apoptosis*, 2012, **17**, 852-870.
33. P. Arciniegas-Grijalba, M. Patiño-Portela, L. Mosquera-Sánchez, J. Guerrero-Vargas and J. Rodríguez-Páez, *Applied Nanoscience*, 2017, **7**, 225-241.
34. S. Liu, T. H. Zeng, M. Hofmann, E. Burcombe, J. Wei, R. Jiang, J. Kong and Y. Chen, *ACS nano*, 2011, **5**, 6971-6980.
35. M. Sawangphruk, P. Srimuk, P. Chiochan, T. Sangsri and P. Siwayaprahm, *Carbon*, 2012, **50**, 5156-5161.
36. M. Shahnawaz Khan, H. N. Abdelhamid and H.-F. Wu, *Colloids and Surfaces B: Biointerfaces*, 2015, **127**, 281-291.
37. S. Das, S. Singh, V. Singh, D. Joung, J. M. Dowding, D. Reid, J. Anderson, L. Zhai, S. I. Khondaker and W. T. Self, *Particle & Particle Systems Characterization*, 2013, **30**, 148-157.
38. K.-H. Liao, Y.-S. Lin, C. W. Macosko and C. L. Haynes, *ACS Applied Materials & Interfaces*, 2011, **3**, 2607-2615.
39. I. Barbolina, C. R. Woods, N. Lozano, K. Kostarelos, K. S. Novoselov and I. S. Roberts, *2D Materials*, 2016, **3**, 025025.
40. L. n. Brunet, D. Y. Lyon, E. M. Hotze, P. J. Alvarez and M. R. Wiesner, *Environmental science & technology*, 2009, **43**, 4355-4360.
41. F. Haghighi, S. Roudbar Mohammadi, P. Mohammadi, S. Hosseinkhani and R. Shipour, *Infection, Epidemiology and Microbiology*, 2013, **1**, 33-38.
42. S. Darbari, Y. Abdi, F. Haghighi, S. Mohajerzadeh and N. Haghighi, *Journal of Physics D: Applied Physics*, 2011, **44**, 245401.
43. N. Haghighi, Y. Abdi and F. Haghighi, *Applied Surface Science*, 2011, **257**, 10096-10100.
44. I.-S. Kim, M. Baek and S.-J. Choi, *Journal of Nanoscience and Nanotechnology*, 2010, **10**, 3453-3458.
45. N. S. Ahmad, N. Abdullah and F. M. Yasin, *BioResources*, 2019, **14**, 8866-8878.
46. M. Y. Guo, F. Liu, Y. H. Leung, Y. He, A. M. C. Ng, A. B. Djurišić, H. Li, K. Shih and W. K. Chan, *The Journal of Physical Chemistry C*, 2017, **121**, 24060-24068.
47. P. Pallavicini, A. Dona, A. Taglietti, P. Minzioni, M. Patrini, G. Dacarro, G. Chirico, L. Sironi, N. Bloise and L. Visai, *Chemical Communications*, 2014, **50**, 1969-1971.
48. C. P. Teng, T. Zhou, E. Ye, S. Liu, L. D. Koh, M. Low, X. J. Loh, K. Y. Win, L. Zhang and M. Y. Han, *Advanced healthcare materials*, 2016, **5**, 2122-2130.
